# Supplementary material for: Indium-Based Silica Materials: Sustainable Syntheses Combined with a Challenging Insertion in SiO2 Mesoporous Structures
Source: MDPI journal article supplement (doi:10.3390/molecules29010102), 2023-12-22
Supplement: s1 [file s1]

Supporting information

**Indium-based silica materials: sustainable syntheses  
combined with a challenging insertion in SiO<sub>2</sub>  
mesoporous structures.**

Amélie Maertens and Carmela Aprile

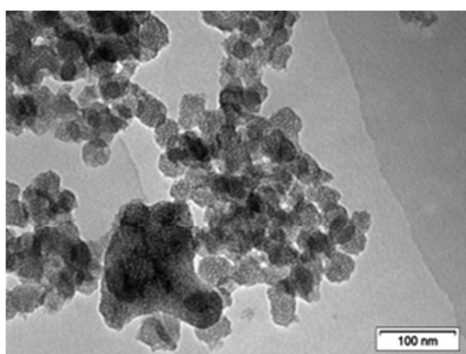

**In-NS-Cl-a**

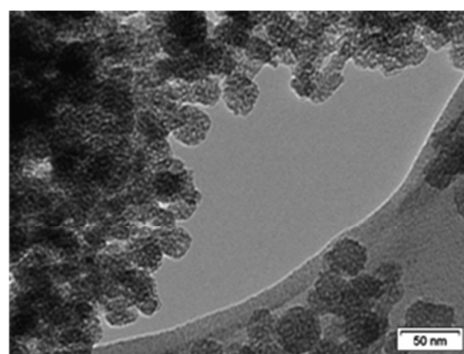

**In-NS-Cl-e**

Figure S1. TEM image of two silica nanospheres embedded indium

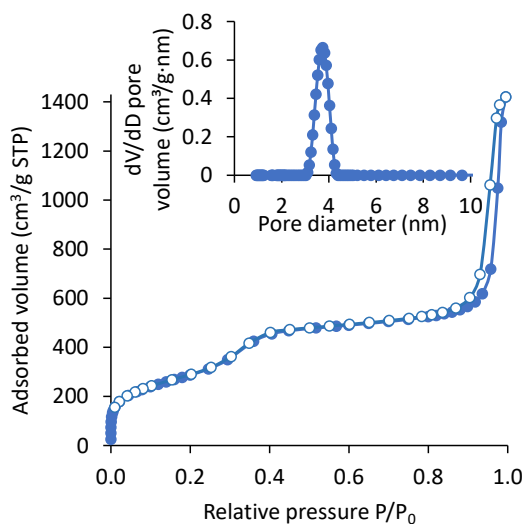

**In-NS-Cl-a**

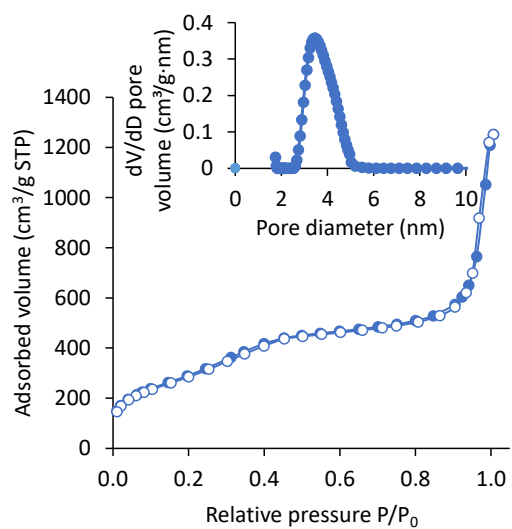

**In-NS-Cl-e**

Figure S2.  $N_2$  physisorption adsorption-desorption isotherm and pore size distribution of two silica nanospheres embedding indium.

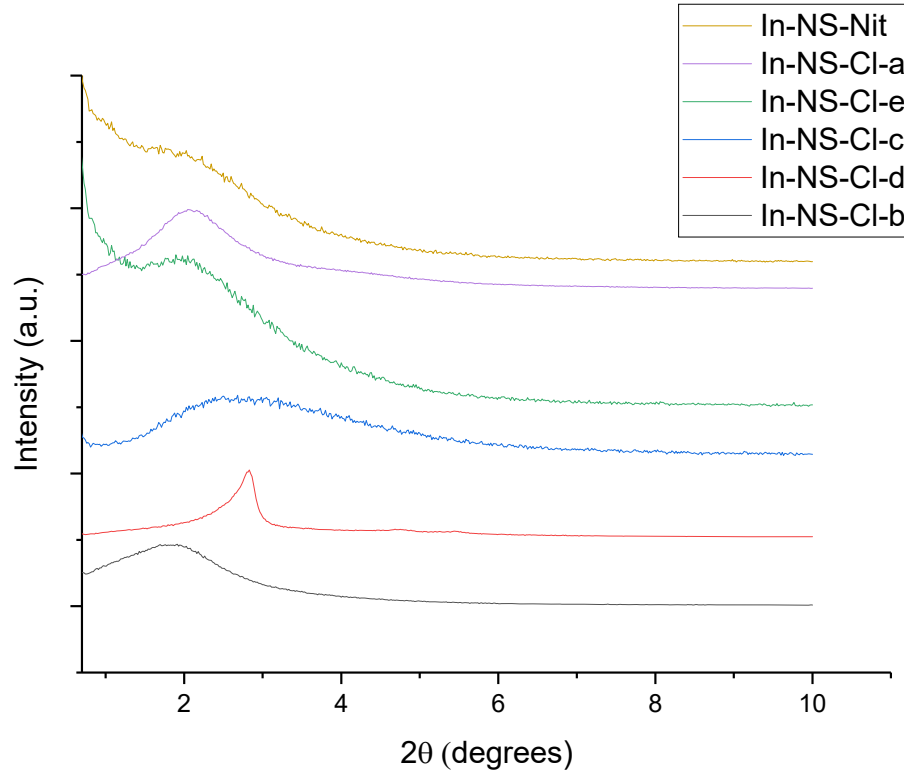

Figure S3. Small angle XRD diffraction pattern of silica nanospheres samples embedding indium

Table S1. XRD parameters for silica nanospheres and acid-free SBA-15 sample.  $2\theta$  is the diffraction angle of  $d_{100}$  diffraction peak,  $a$  is the lattice parameter.

| Samples                   | $2\theta$     | $d_{100}$ (nm) | $a$ (nm) | Wall thickness (nm) |
|---------------------------|---------------|----------------|----------|---------------------|
| NS-Cl <sub>3</sub> (a)    | $\approx 1.8$ | -              | -        | -                   |
| NS-Cl <sub>3</sub> (b)    | $\approx 2.8$ | -              | -        | -                   |
| NS-Cl <sub>3</sub> (c)    | $\approx 2.1$ | -              | -        | -                   |
| NS-Cl <sub>3</sub> (d)    | 2.1           | 4.2            | 4.9      | 1.5                 |
| NS-Cl <sub>3</sub> (e)    | $\approx 2.0$ | -              | -        | -                   |
| NS-NO <sub>3</sub> (a)    | $\approx 2.3$ | -              | -        | -                   |
| AF-Cl <sub>3</sub> -HT    | 1.0           | 8.7            | 10.0     | 1.0                 |
| AF-Cl <sub>3</sub> -RT    | 1.1           | 7.7            | 8.9      | 4.9                 |
| AF-Cl <sub>3</sub> -pH_HT | 0.9           | 9.7            | 11.2     | 2.2                 |
| AF-Cl <sub>3</sub> -pH_RT | 0.9           | 10.1           | 11.7     | 3.7                 |

$d_{100}$  is calculated as follow :  $\frac{0.154}{2 \sin \theta}$ ,  $a$  as :  $\frac{2d_{100}}{\sqrt{3}}$  and wall thickness :  $a - BJH/DFT \text{ pore diameter}$

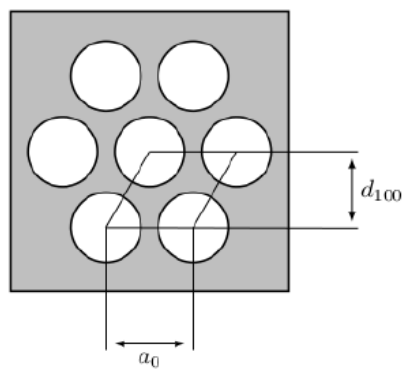

Figure S4. Bidimensional hexagonal lattice.  $d_{100}$ , inter-reticular distance and  $a_0$ , lattice parameter.

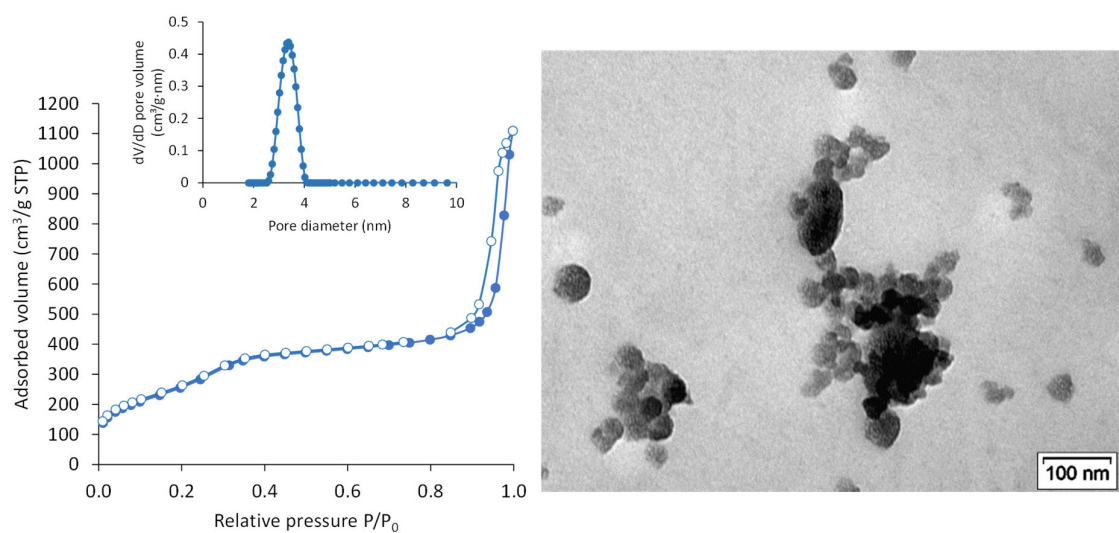

Figure S5.  $N_2$  physisorption adsorption-desorption isotherm and TEM image of In-NS-Cl-f
